# Supplementary material
Source: PubMed Central journal article supplement (PMC7296446)
Supplement: NIHMS998253-supplement-1.pdf [file NIHMS998253-supplement-1.pdf]

**Supplementary Table 1: Standardized Incidence Ratios for Cancer among CF and Non-CF Lung Recipients**

| Cancer Type                   | CF Recipient   |                   | Non-CF Recipient |                   |
|-------------------------------|----------------|-------------------|------------------|-------------------|
|                               | Observed Count | SIR (95% CI)      | Observed Count   | SIR (95% CI)      |
| All Cancers                   | 85             | 9.9 (7.9, 12.3)   | 760              | 2.7 (2.5, 2.9)    |
| Lip                           | 3              | 203 (41.8, 592)   | 12               | 30.6 (15.8, 53.5) |
| Salivary Gland                | 1              | 32.5 (0.8, 181)   | 4                | 6.3 (1.7, 16.2)   |
| HPV-Related Oropharynx        | 0              | 0 (0, 40.8)       | 3                | 1 (0.2, 2.9)      |
| Other Oral Cavity and Pharynx | 0              | 0 (0, 43.2)       | 7                | 2.3 (0.9, 4.8)    |
| Upper Gastrointestinal Tract  | 5              | 27.5 (8.9, 64.1)  | 18               | 2.3 (1.3, 3.6)    |
| Esophagus                     | 3              | 56.3 (11.6, 165)  | 4                | 1.3 (0.4, 3.3)    |
| Stomach                       | 1              | 10.4 (0.3, 58.1)  | 8                | 2.2 (0.9, 4.3)    |
| Small Intestine               | 1              | 30.4 (0.8, 170)   | 6                | 5.2 (1.9, 11.3)   |
| Colorectum                    | 15             | 24.2 (13.5, 39.8) | 46               | 1.7 (1.3, 2.3)    |
| Colon                         | 13             | 33.8 (18, 57.8)   | 38               | 2.1 (1.5, 2.9)    |
| Proximal Colon                | 7              | 45.7 (18.4, 94.1) | 25               | 2.8 (1.8, 4.2)    |
| Distal Colon                  | 5              | 29 (9.4, 67.7)    | 10               | 1.3 (0.6, 2.4)    |
| Rectum                        | 2              | 9.1 (1.1, 33)     | 8                | 1 (0.4, 1.9)      |
| Anus                          | 0              | 0 (0, 91.3)       | 9                | 9.6 (4.4, 18.3)   |
| Liver                         | 0              | 0 (0, 50.4)       | 7                | 2.1 (0.8, 4.2)    |
| Intrahepatic Bile Duct        | 1              | 130 (3.3, 727)    | 2                | 5.7 (0.7, 20.4)   |
| Gallbladder                   | 0              | 0 (0, 363)        | 1                | 1.9 (0, 10.4)     |
| Other Biliary Tract           | 1              | 65.5 (1.7, 365)   | 2                | 2.5 (0.3, 8.9)    |
| Pancreas                      | 1              | 9.8 (0.2, 54.3)   | 6                | 1 (0.4, 2.3)      |
| Larynx                        | 1              | 17.2 (0.4, 95.7)  | 13               | 4.2 (2.2, 7.1)    |
| Lung                          | 1              | 1.9 (0, 10.5)     | 215              | 5.4 (4.7, 6.2)    |
| Soft Tissue including Heart   | 3              | 26.5 (5.5, 77.4)  | 8                | 5.7 (2.4, 11.2)   |
| Melanoma                      | 1              | 1.4 (0, 7.9)      | 18               | 1.8 (1.1, 2.8)    |
| Other Non-Epithelial Skin     | 0              | 0 (0, 97)         | 16               | 23.5 (13.5, 38.2) |
| Breast                        | 0              | 0 (0, 2.3)        | 27               | 0.7 (0.5, 1)      |
| Cervix                        | 0              | 0 (0, 13.1)       | 2                | 1 (0.1, 3.5)      |
| Uterine Corpus                | 1              | 4.2 (0.1, 23.6)   | 4                | 0.5 (0.1, 1.3)    |
| Ovary                         | 1              | 6 (0.2, 33.4)     | 3                | 0.8 (0.2, 2.3)    |
| Vagina                        | 0              | 0 (0, 620)        | 2                | 11.1 (1.3, 40.1)  |
| Vulva                         | 0              | 0 (0, 139)        | 9                | 16.8 (7.7, 31.9)  |

|                             |    |                   |     |                   |
|-----------------------------|----|-------------------|-----|-------------------|
| Prostate                    | 0  | 0 (0, 7.2)        | 38  | 0.7 (0.5, 0.9)    |
| Testis                      | 0  | 0 (0, 11.2)       | 2   | 4.5 (0.5, 16.2)   |
| Penis                       | 0  | 0 (0, 540)        | 1   | 4 (0.1, 22.5)     |
| Urinary Bladder             | 0  | 0 (0, 34.4)       | 18  | 2.6 (1.5, 4.1)    |
| Kidney and Renal Pelvis     | 3  | 11 (2.3, 32.3)    | 17  | 1.8 (1.1, 2.9)    |
| Eye and Orbit               | 0  | 0 (0, 173)        | 2   | 4.4 (0.5, 15.9)   |
| Brain                       | 0  | 0 (0, 15.9)       | 3   | 1 (0.2, 2.9)      |
| Thyroid                     | 4  | 6.2 (1.7, 16)     | 9   | 2 (0.9, 3.7)      |
| Hodgkin Lymphoma            | 1  | 4.3 (0.1, 24.1)   | 2   | 2.3 (0.3, 8.2)    |
| Non-Hodgkin Lymphoma        | 34 | 61.8 (42.8, 86.3) | 128 | 9.4 (7.9, 11.2)   |
| NHL - Nodal                 | 21 | 69.6 (43.1, 106)  | 52  | 7.1 (5.3, 9.3)    |
| NHL - Extranodal            | 13 | 94.8 (50.5, 162)  | 73  | 23.2 (18.2, 29.1) |
| Diffuse Large B-cell*       | 26 | 160 (105, 235)    | 80  | 23.8 (18.9, 29.7) |
| Myeloma                     | 0  | 0 (0, 63.5)       | 3   | 0.9 (0.2, 2.7)    |
| Acute Myeloid Leukemia      | 1  | 10.7 (0.3, 59.8)  | 9   | 5.2 (2.4, 9.9)    |
| Chronic Myeloid Leukemia    | 0  | 0 (0, 93.9)       | 1   | 1.6 (0, 8.7)      |
| Acute Monocytic Leukemia    | 1  | 178 (4.5, 991)    | 0   | 0 (0, 35.2)       |
| Other Acute Leukemia        | 0  | 0 (0, 775)        | 1   | 9.2 (0.2, 51.2)   |
| Mesothelioma                | 0  | 0 (0, 391)        | 1   | 1.7 (0, 9.6)      |
| Kaposi Sarcoma              | 1  | 409 (10.3, 2280)  | 7   | 77.5 (31.2, 160)  |
| Miscellaneous               | 2  | 6.6 (0.8, 23.9)   | 46  | 4.8 (3.5, 6.4)    |
| Poorly Specified Morphology | 3  | 28.8 (5.9, 84.3)  | 40  | 6.7 (4.8, 9.1)    |

\*Diffuse Large B-cell Lymphoma can be nodal or extranodal.
